# Supplementary material for: Sibling Influences on Trajectories of Maladaptive Behaviors in Autism
Source: MDPI journal article supplement (doi:10.3390/jcm11185349), 2022-09-12
Supplement: s1 [file s1]

**Table S1.** Teacher- and parent-reported ABC sample sizes across age groupings.

| Age (in years) | Teacher Report |            | Parent Report |            |
|----------------|----------------|------------|---------------|------------|
|                | <i>n</i>       | Datapoints | <i>n</i>      | Datapoints |
| <b>9-10</b>    | 64             | 99         | 69            | 94         |
| <b>11-12</b>   | 66             | 130        | 117           | 251        |
| <b>13-14</b>   | 120            | 297        | 117           | 405        |
| <b>15-16</b>   | 96             | 227        | 53            | 143        |
| <b>17-18</b>   | 80             | 143        | 25            | 39         |

Note: *n* = number of unique participants during a specified age grouping; Datapoints = number of entries across all participants during a specified age grouping.
